# Supplementary material for: Plasma Fibulin-5 Levels as an Independent Predictor of a Poor Outcome after an Aneurysmal Subarachnoid Hemorrhage
Source: MDPI journal article supplement (doi:10.3390/ijms232315184), 2022-12-02
Supplement: s1 [file s1]

**Supplementary Tables, Figures and Figure Legends**

**Plasma fibulin-5 levels as an independent predictor of poor outcome  
after aneurysmal subarachnoid hemorrhage**

Yume Suzuki, Hiroki Oinaka, Hideki Nakajima, Mai Nampei, Fumihiro Kawakita, Yoichi Miura,  
Ryuta Yasuda, Naoki Toma, Hidenori Suzuki, and pSEED group

**Address correspondence to:** Hidenori Suzuki, M.D., Ph.D.  
Department of Neurosurgery, Mie University Graduate School of Medicine,  
2-174 Edobashi, Tsu, Mie 514-8507, Japan  
E-mail: [suzuki02@med.mie-u.ac.jp](mailto:suzuki02@med.mie-u.ac.jp)

**Table S1.** Relationships between plasma fibulin-5 levels and admission World Federation of Neurological Surgeons (WFNS) grade or outcome measures

|                                |                | Days 1–3               | Days 4–6               | Days 7–9               | Days 10–12             |
|--------------------------------|----------------|------------------------|------------------------|------------------------|------------------------|
| WFNS grades I–III at admission | Yes            | 399.8<br>(304.2–506.7) | 434.4<br>(314.7–561.6) | 450.2<br>(318.6–570.5) | 467.2<br>(358.9–599.0) |
|                                | No             | 437.0<br>(325.6–559.0) | 535.8<br>(397.2–667.2) | 497.8<br>(402.8–614.2) | 507.0<br>(433.4–698.6) |
|                                | <i>p</i> value | 0.248                  | <0.001                 | 0.018                  | 0.065                  |
| Angiographic vasospasm         | Yes            | 433.2<br>(308.1–564.2) | 491.4<br>(363.6–626.0) | 489.9<br>(376.6–614.4) | 455.7<br>(351.7–575.0) |
|                                | No             | 400.2<br>(307.2–511.8) | 441.2<br>(346.6–588.8) | 456.6<br>(352.0–574.4) | 507.0<br>(370.6–658.6) |
|                                | <i>p</i> value | 0.566                  | 0.525                  | 0.356                  | 0.080                  |
| DCI                            | Yes            | 459.0<br>(345.6–511.8) | 493.2<br>(431.0–601.6) | 488.6<br>(417.8–615.2) | 459.0<br>(386.8–598.2) |
|                                | No             | 409.6<br>(304.6–519.1) | 441.2<br>(336.3–615.9) | 457.0<br>(345.0–580.0) | 496.4<br>(364.3–627.4) |
|                                | <i>p</i> value | 0.397                  | 0.210                  | 0.256                  | 0.660                  |
| Delayed cerebral infarction    | Yes            | 421.0<br>(305.6–503.4) | 445.2<br>(392.8–610.0) | 450.4<br>(385.8–571.8) | 500.0<br>(390.0–688.4) |
|                                | No             | 412.6<br>(307.5–546.5) | 457.0<br>(336.3–605.6) | 473.0<br>(359.0–589.9) | 490.8<br>(365.9–623.2) |
|                                | <i>p</i> value | 0.762                  | 0.600                  | 0.899                  | 0.537                  |
| 90-day mRS 0–2                 | Yes            | 410.0<br>(305.3–518.1) | 433.2<br>(312.1–569.4) | 446.4<br>(324.8–560.1) | 483.2 ±175.3           |
|                                | No             | 433.2<br>(317.0–520.0) | 521.4<br>(397.2–640.2) | 526.2<br>(402.8–646.4) | 556.3 ±218.6           |
|                                | <i>p</i> value | 0.687                  | 0.002                  | 0.004                  | 0.014*                 |
| Neurological exacerbation      | Yes            | 430.2<br>(317.1–550.7) | 503.0<br>(406.9–601.8) | 551.6<br>(422.6–620.4) | 495.4<br>(395.7–649.8) |
|                                | No             | 409.8<br>(305.2–518.0) | 440.4<br>(332.9–609.4) | 448.7<br>(335.3–570.7) | 493.0<br>(360.8–625.2) |
|                                | <i>p</i> value | 0.340                  | 0.050                  | 0.010                  | 0.548                  |

Data, mean ±standard deviation, or median (interquartile range), ng/ml; *p* value, \*unpaired *t* test, or Mann-Whitney U test; DCI, delayed cerebral ischemia; mRS, modified Rankin Scale.

**Table S2.** Clinical variables related to 90-day poor outcome or modified Rankin Scale (mRS) 3–6 in patients with admission World Federation of Neurological Surgeons (WFNS) grades I–III

|                         | Total<br>(n=127) | mRS 0–2<br>(n=100) | mRS 3–6<br>(n=27) | <i>p</i> value      |
|-------------------------|------------------|--------------------|-------------------|---------------------|
| Age                     |                  |                    |                   |                     |
| Average $\pm$ SD, years | 61.9 $\pm$ 14.0  | 58.3 $\pm$ 12.2    | 75.0 $\pm$ 12.7   | <0.001 <sup>a</sup> |
| $\geq$ 75 years old     | 23 (18.1)        | 8 (8.0)            | 15 (55.6)         | <0.001 <sup>b</sup> |
| Female                  | 87 (68.5)        | 64 (64.0)          | 23 (85.2)         | 0.027 <sup>b</sup>  |
| Past history            |                  |                    |                   |                     |
| SAH                     | 7 (5.5)          | 5 (5.0)            | 2 (7.4)           | 0.461 <sup>b</sup>  |
| Cerebral infarction     | 6 (4.7)          | 2 (2.0)            | 4 (14.8)          | 0.018 <sup>b</sup>  |
| Hypertension            | 62 (48.8)        | 44 (44.0)          | 18 (66.7)         | 0.037 <sup>c</sup>  |
| Dyslipidemia            | 17 (13.4)        | 11 (11.0)          | 6 (22.2)          | 0.117 <sup>b</sup>  |
| Diabetes mellitus       | 8 (6.3)          | 5 (5.0)            | 3 (11.1)          | 0.227 <sup>b</sup>  |
| Family history of SAH   | 17 (13.4)        | 14 (14.0)          | 3 (11.1)          | 0.490 <sup>b</sup>  |
| Current smoking         | 31 (24.4)        | 28 (28.0)          | 3 (11.1)          | 0.054 <sup>b</sup>  |
| Pre-onset mRS           |                  |                    |                   |                     |
| 0                       | 120 (94.5)       | 97 (97.0)          | 23 (85.2)         | 0.037 <sup>b</sup>  |
| 1                       | 6 (4.7)          | 3 (3.0)            | 3 (11.1)          | 0.110 <sup>b</sup>  |
| 2                       | 1 (0.8)          | 0 (0.0)            | 1 (3.7)           | 0.213 <sup>b</sup>  |
| Admission WFNS grade    |                  |                    |                   |                     |
| I                       | 61 (48.0)        | 55 (55.0)          | 6 (22.2)          | 0.002 <sup>c</sup>  |
| II                      | 56 (44.1)        | 41 (41.0)          | 15 (55.6)         | 0.176 <sup>c</sup>  |
| III                     | 10 (7.9)         | 4 (4.0)            | 6 (22.2)          | 0.006 <sup>b</sup>  |
| Modified Fisher grade   |                  |                    |                   |                     |
| 1                       | 23 (18.1)        | 20 (20.0)          | 3 (11.1)          | 0.222 <sup>b</sup>  |
| 2                       | 5 (3.9)          | 4 (4.0)            | 1 (3.7)           | 0.713 <sup>b</sup>  |
| 3                       | 70 (55.1)        | 59 (59.0)          | 11 (40.7)         | 0.091 <sup>c</sup>  |
| 4                       | 29 (22.8)        | 17 (17.0)          | 12 (44.4)         | 0.003 <sup>c</sup>  |
| Acute hydrocephalus     | 29 (22.8)        | 16 (16.0)          | 13 (48.1)         | <0.001 <sup>c</sup> |
| Ruptured AN location    |                  |                    |                   |                     |
| ACA                     | 42 (33.1)        | 39 (39.0)          | 3 (11.1)          | 0.004 <sup>b</sup>  |
| ICA                     | 58 (45.7)        | 38 (38.0)          | 20 (74.1)         | <0.001 <sup>c</sup> |
| MCA                     | 19 (15.0)        | 16 (16.0)          | 3 (11.1)          | 0.387 <sup>b</sup>  |
| VA-BA                   | 8 (6.3)          | 7 (7.0)            | 1 (3.7)           | 0.461 <sup>b</sup>  |
| Anterior circulation    | 119 (93.7)       | 93 (93.0)          | 26 (96.3)         | 0.461 <sup>b</sup>  |
| Multiple Aneurysms      | 37 (29.1)        | 27 (27.0)          | 10 (37.0)         | 0.308 <sup>c</sup>  |
| Treatment modality      |                  |                    |                   |                     |
| Clipping                | 99 (78.0)        | 76 (76.0)          | 23 (85.2)         | 0.228 <sup>b</sup>  |
| Coiling                 | 28 (22.0)        | 23 (23.0)          | 4 (14.8)          | 0.228 <sup>b</sup>  |
| CSF drainage            | 36 (28.3)        | 27 (27.0)          | 9 (33.3)          | 0.517 <sup>c</sup>  |

|                             |            |           |            |                     |
|-----------------------------|------------|-----------|------------|---------------------|
| Prophylactic drug for DCI   |            |           |            |                     |
| Fasudil hydrochloride       | 126 (99.2) | 99 (99.0) | 27 (100.0) | 0.787 <sup>b</sup>  |
| Cilostazol                  | 105 (82.7) | 82 (82.0) | 23 (85.2)  | 0.474 <sup>b</sup>  |
| Ethyl icosapentate          | 69 (54.3)  | 54 (54.0) | 15 (55.6)  | 0.886 <sup>c</sup>  |
| Statin                      | 32 (25.2)  | 24 (24.0) | 8 (29.6)   | 0.550 <sup>c</sup>  |
| Angiographic vasospasm      | 35 (27.6)  | 25 (25.0) | 10 (37.0)  | 0.214 <sup>c</sup>  |
| DCI                         | 18 (14.2)  | 7 (7.0)   | 11 (40.7)  | <0.001 <sup>b</sup> |
| Delayed cerebral infarction | 27 (21.3)  | 12 (12.0) | 15 (55.6)  | <0.001 <sup>c</sup> |

Data are number of cases (%) unless otherwise specified and compared between mRS 0–2 and 3–6. *p* values are determined by <sup>a</sup>unpaired *t* test, <sup>b</sup>Fisher's exact test, or <sup>c</sup>Pearson's chi-square test.

ACA, anterior cerebral artery; AN, aneurysm; CSF, cerebrospinal fluid; DCI, delayed cerebral ischemia; ICA, internal carotid artery; MCA, middle cerebral artery; SAH, subarachnoid hemorrhage; SD, standard deviation; VA-BA, vertebral artery-basilar artery.



**Table S3.** Relationships between plasma fibulin-5 levels and outcome measures in patients with admission World Federation of Neurological Surgeons (WFNS) grades I–III

|                             |                | Days 1–3               | Days 4–6               | Days 7–9               | Days 10–12             |
|-----------------------------|----------------|------------------------|------------------------|------------------------|------------------------|
| Angiographic vasospasm      | Yes            | 410.0<br>(304.6–502.4) | 434.4<br>(270.7–586.1) | 450.2<br>(324.8–593.9) | 406.2<br>(338.5–571.5) |
|                             | No             | 396.8<br>(303.5–505.5) | 433.8<br>(333.8–550.1) | 449.5<br>(316.5–562.6) | 485.5<br>(366.2–625.5) |
|                             | <i>p</i> value | 0.754                  | 0.722                  | 0.812                  | 0.200                  |
| DCI                         | Yes            | 461.4<br>(346.8–509.7) | 492.3<br>(436.3–569.3) | 525.7<br>(418.4–616.7) | 473.2<br>(396.7–791.6) |
|                             | No             | 388.8<br>(295.4–504.2) | 401.4<br>(310.0–560.6) | 438.4<br>(307.0–558.8) | 467.2<br>(354.0–598.4) |
|                             | <i>p</i> value | 0.211                  | 0.051                  | 0.044                  | 0.374                  |
| Delayed cerebral infarction | Yes            | 410.0<br>(310.7–475.3) | 491.4<br>(413.1–547.8) | 463.8<br>(405.4–573.9) | 500.0<br>(392.8–656.3) |
|                             | No             | 399.4<br>(302.0–513.3) | 394.2<br>(308.0–563.1) | 441.7<br>(311.8–567.2) | 451.5<br>(344.9–593.0) |
|                             | <i>p</i> value | 0.841                  | 0.091                  | 0.246                  | 0.241                  |
| 90-day mRS 0–2              | Yes            | 375.2<br>(289.3–499.7) | 398.1<br>(302.0–518.9) | 417.0<br>(305.9–543.2) | 445.2<br>(344.9–573.0) |
|                             | No             | 459.8<br>(385.7–579.4) | 524.6<br>(404.6–626.7) | 571.8<br>(481.0–685.0) | 598.2<br>(421.8–750.5) |
|                             | <i>p</i> value | 0.024                  | 0.003                  | <0.001                 | 0.005                  |
| Neurological exacerbation   | Yes            | 461.4<br>(362.3–576.2) | 507.7<br>(440.0–657.2) | 561.9<br>(442.7–652.0) | 508.6<br>(398.9–709.8) |
|                             | No             | 384.8<br>(288.6–497.7) | 386.4<br>(306.1–534.6) | 422.0<br>(305.0–536.0) | 447.8<br>(343.9–591.0) |
|                             | <i>p</i> value | 0.040                  | <0.001                 | <0.001                 | 0.075                  |

Data, median (interquartile range), ng/ml; *p* value, Mann-Whitney U test; DCI, delayed cerebral ischemia; mRS, modified Rankin Scale.

**Table S4.** Multivariate logistic regression analyses for predicting 90-day poor outcome in patients with admission World Federation of Neurological Surgeons (WFNS) grades I–III of subarachnoid hemorrhage

| Variables                           | Odds ratio | 95% CI      | <i>p</i> value |
|-------------------------------------|------------|-------------|----------------|
| Age ≥75 years old                   | 5.25       | 1.09-25.21  | 0.039          |
| Admission WFNS grade I              | 0.13       | 0.02-0.70   | 0.018          |
| Ruptured ICA aneurysm               | 7.85       | 1.63-37.72  | 0.010          |
| Delayed cerebral infarction         | 52.85      | 7.42-376.52 | <0.001         |
| Fibulin-5 at days 7–9 ≥476.8ng/ml   | 18.14      | 3.25-101.39 | <0.001         |
| Acute hydrocephalus                 | 8.80       | 1.67-46.39  | 0.010          |
| Female                              |            |             | 0.664          |
| Past history of cerebral infarction |            |             | 0.243          |
| Past history of hypertension        |            |             | 0.465          |
| Pre-onset mRS 0                     |            |             | 0.211          |
| Modified Fisher grade 4             |            |             | 0.085          |

Variables are selected by the forward stepwise method. Plasma fibulin-5 levels at days 7–9 are categorized using the cut-off value that was determined in **Supplementary Figure S3**. CI, confidence interval; ICA, internal carotid artery; mRS, modified Rankin Scale.

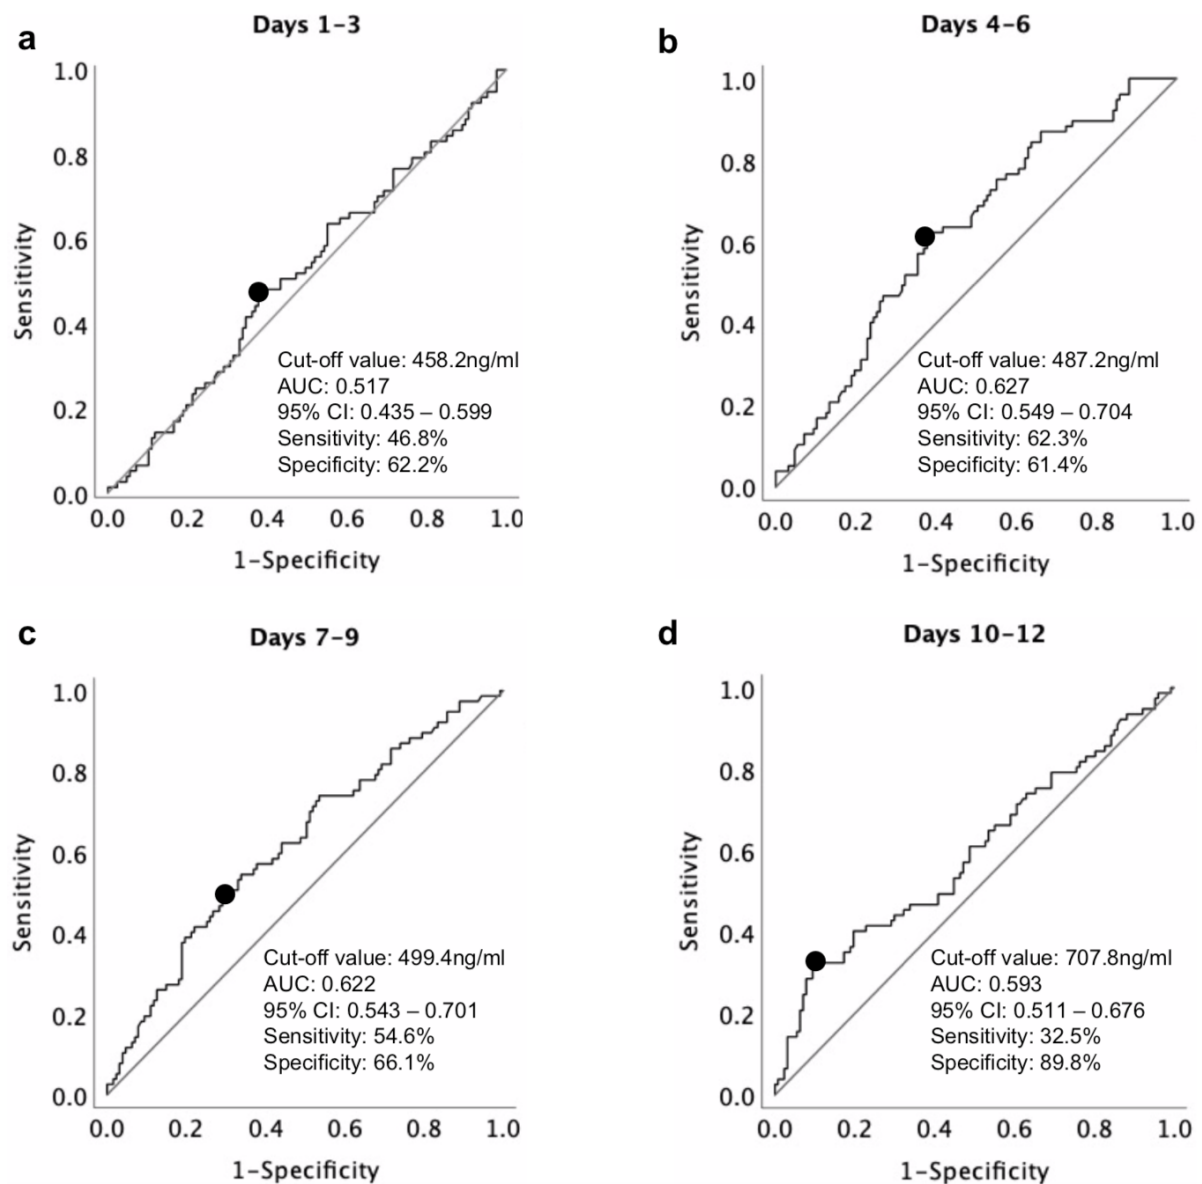

**Figure S1.** Receiver-operating characteristic curve for the performance of plasma fibulin-5 levels at each sampling point (days 1-3 [a], days 4-6 [b], days 7-9 [c], and days 10-12 [d]) according to the 90-day outcome (modified Rankin Scale 0-2 versus 3-6) after subarachnoid hemorrhage.

AUC, area under the curve; CI, confidence interval.

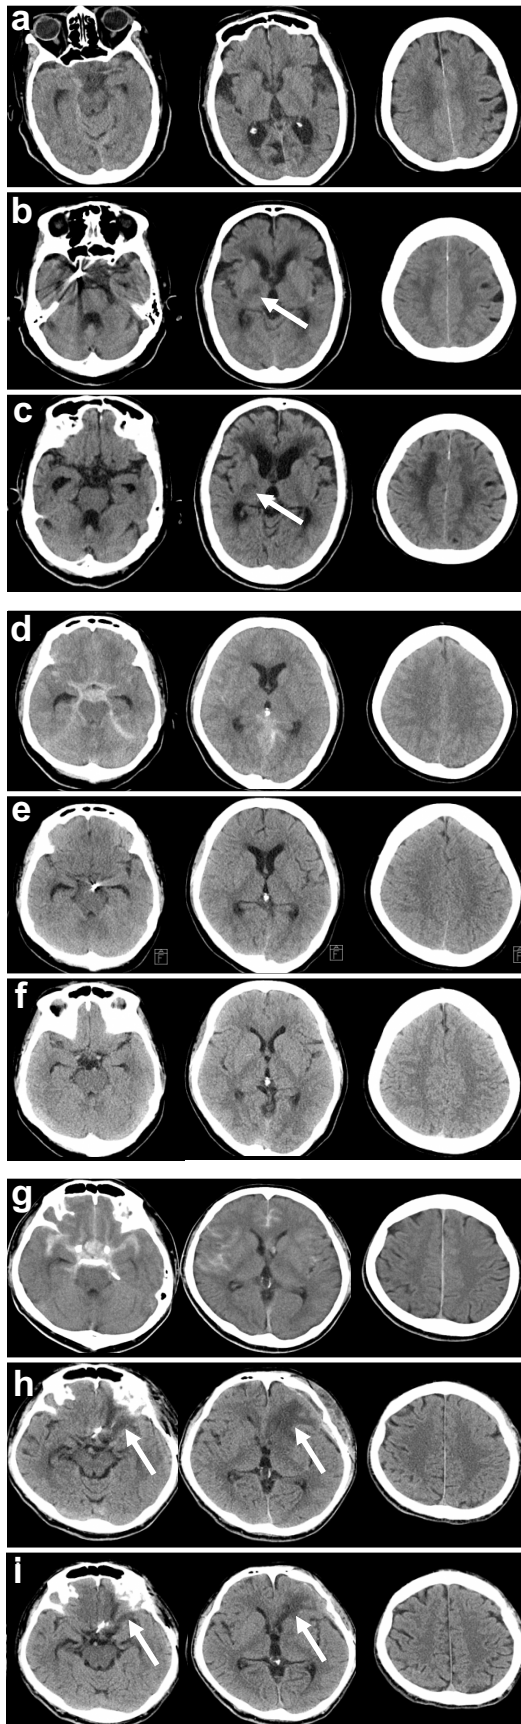

**Case 1.** Computed tomographic (CT) scans at admission (**a**), days 14 (**b**) and 90 (**c**) in an 86-year-old female patient with a ruptured internal carotid artery-posterior communicating artery aneurysm. Although admission World Federation of Neurological Surgeons (WFNS) grade is I and modified Fisher grade is 1 (**a**), delayed cerebral infarction (*arrow*) occurs (**b**), resulting in poor outcome (90 day-modified Rankin Scale [mRS] 4). Plasma fibulin-5 level at days 4–6 was 561.0 ng/ml ( $\geq 487.2$  ng/ml).

**Case 2.** CT scans at admission (**d**), days 14 (**e**) and 90 (**f**) in a 40-year-old female patient with a ruptured basilar artery-superior cerebellar artery aneurysm. Although admission WFNS grade is V and modified Fisher grade is 3 (**d**), no delayed cerebral infarction occurs, leading to good outcome (90 day-mRS 1). Plasma fibulin-5 level at days 4–6 was 346.6 ng/ml ( $< 487.2$  ng/ml).

**Case 3.** CT scans at admission (**g**), days 14 (**h**) and 30 (**i**) in a 53-year-old male patient with a ruptured anterior communicating artery aneurysm. Admission WFNS grade is II, but modified Fisher grade 4 of subarachnoid hemorrhage (**g**) causes delayed cerebral infarction (*arrow*; **h**). However, this patient's outcome was good (90 day-mRS 1). Plasma fibulin-5 level at days 4–6 was 247.0 ng/ml ( $< 487.2$  ng/ml).

**Figure S2.** CT scans and plasma fibulin-5 levels at days 4–6 in 3 representative cases.

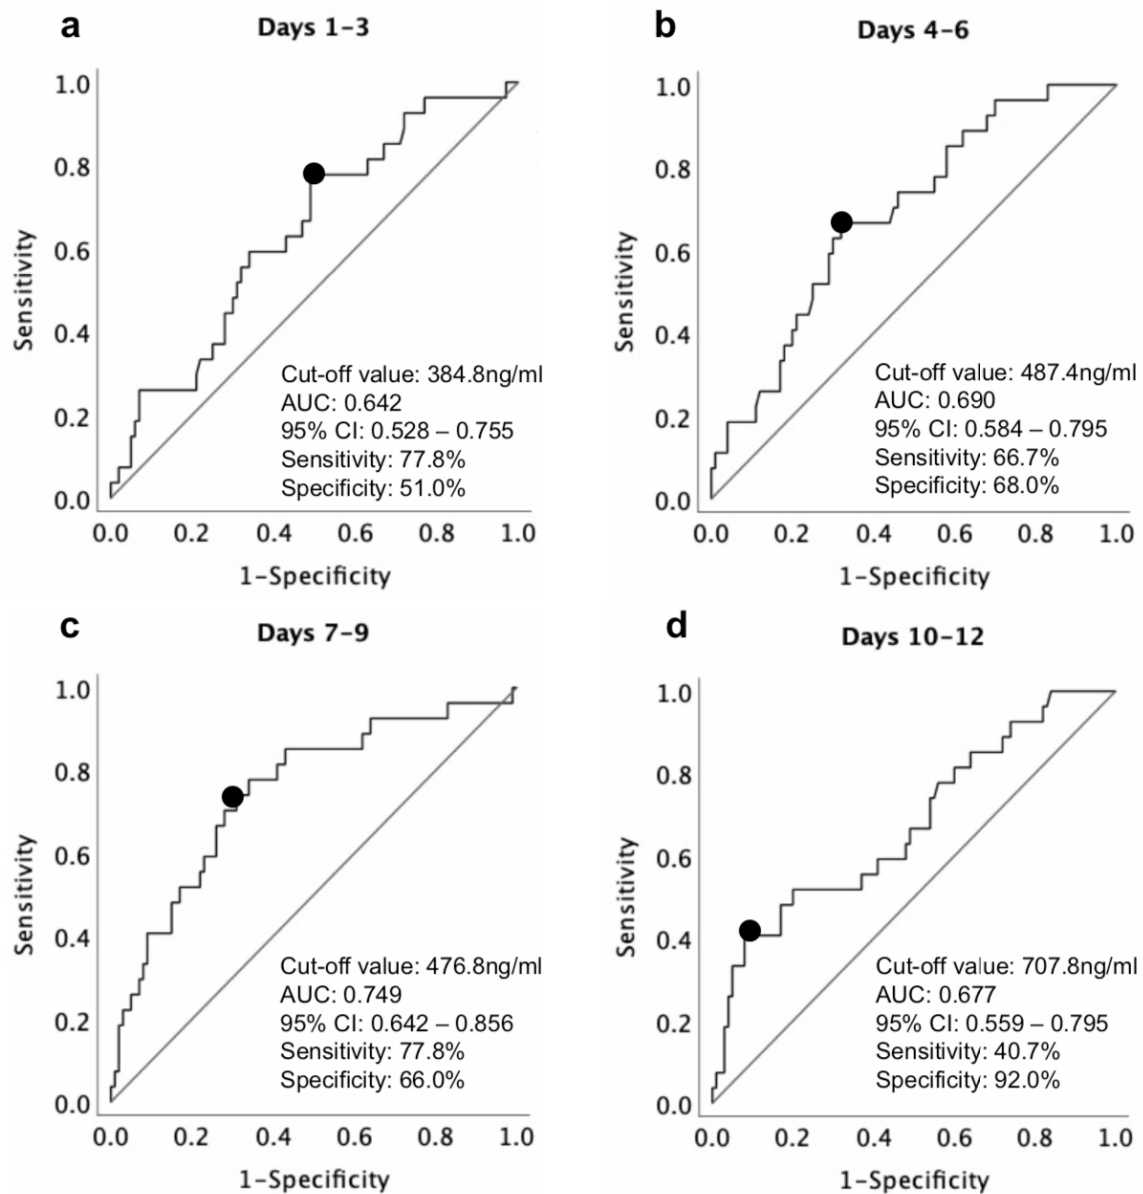

**Figure S3.** Receiver-operating characteristic curve for the performance of plasma fibulin-5 levels at each sampling point (days 1-3 [a], days 4-6 [b], days 7-9 [c], and days 10-12 [d]) according to the 90-day outcome (modified Rankin Scale 0-2 versus 3-6) in patients with admission World Federation of Neurological Surgeons grades I-III of subarachnoid hemorrhage. AUC, area under the curve; CI, confidence interval.
